# Supplementary material for: Noninvasive Detection of Fetal Genetic Variations through Polymorphic Sites Sequencing of Maternal Plasma DNA
Source: bioRxiv or medRxiv preprint supplement (doi:10.1101/2021.01.26.21250573), 2021-05-14
Supplement: Supplementary file [file media-1.pdf]

## **Supplementary Information**

### **Noninvasive Detection of Fetal Genetic Variations through Polymorphic Sites Sequencing of Maternal Plasma DNA**

**Song Gao\***

The State Key Laboratory Breeding Base of Basic Science of Stomatology & Key Laboratory of Oral Biomedicine Ministry of Education, School & Hospital of Stomatology, Wuhan University, Wuhan, China.

\*Corresponding author

**Song Gao**

Associate Investigator  
School & Hospital of Stomatology,  
Wuhan University,  
237 Luoyu Road, Wuhan, China, 430079  
Email: [gaos@whu.edu.cn](mailto:gaos@whu.edu.cn)

## Supplementary Methods

### Dataset:

The insertion/deletion polymorphism dataset (BioProject ID: PRJNA387652): A panel of 44 biallelic insertion/deletion polymorphic sites plus *ZFX/ZFY* was amplified using cfDNA or maternal genomic DNA as template. Some of the cfDNA samples were also sequenced using low coverage whole genome sequencing.

The replication dataset (BioProject ID: PRJNA517742): Genomic DNAs from two independent blood samples were mixed generating samples with minor allele frequencies of 0.5%, 1.0%, 5% and 10%, respectively. Mixed samples were PCR amplified using 564 primer pairs and sequenced.

The simulated datasets: Five hundred random 70-bp amplicon sequences were generated, and specific mutations were introduced into each amplicon to simulate polymorphic sites having four to six alleles each and could be identified by at least two unique 12-mer indexes. Fetal fraction in each sample was simulated as one of the following values: 0.02, 0.05, 0.10, 0.15, 0.20, 0.25, 0.30, 0.35, 0.40 and 0.45. In each simulated sample, a total of 400 polymorphic sites were selected and each had 200 genomic copies. Each polymorphic site was assigned to be one of the possible maternal-fetal genotypes randomly, and different number of allelic sequence amplicons was generated. For example, if the fetal fraction was 0.05, and the genotype was “AB|AC”, 100 copies of allele seqA, 95 copies of allele seqB and 5 copies of allele seqC were produced as amplicon templates for a polymorphic site having the genotype AB|AC. After generating amplicon templates for all of the polymorphic sites in a sample, sequencing reads were simulated using the ART simulator with the following command “art\_illumina -ss HSXt -amp -i <inputfile> -na -l 65 -f <fold> -o <outputfile>”.

### Reads Processing and Mapping

Reads retrieved from SRA or simulated were filtered out using custom scripts as follows. For each read, base positions with a quality score of 14 or less were identified, and then the longest subsequence was selected whereas each base in the subsequence had a quality score greater than 14. Subsequently, filtered reads were mapped first to unique polymorphic sites using 12-mer indexes, and then each read was mapped to a specific allele using unique allelic indexes. Finally, different alleles were counted for each polymorphic site in each sample.

### Fetal Fraction Estimation

For each polymorphic site, read counts for all alleles were sorted in descending order and labeled as R1, R2, R3, etc., and the allelic read count  $R_i$  was considered as a noise background if its relative value ( $RR_i = R_i / \sum_{j=1}^i R_j$ ) was less than the background threshold ( $\alpha$ ). All polymorphic sites used for fetal fraction estimation were assumed to be one of the normal disomy-disomy maternal-fetal genotypes (AA|AA, AA|AB, AB|AA, AB|AB or AB|AC, where the portion before the vertical bar denotes the maternal genotype and the portion after it denotes the fetal genotype), as the majority of the polymorphic sites were from chromosomes that were normal and only a

small portion of them were abnormal if any at all. For each polymorphic from a reference normal disomy-disomy chromosome, there are at most three informative alleles exist. In an ideal situation, if one or three alleles are detected for a target site, then its genotype can be determined unambiguously, while if two alleles are detected, a single measure of  $R1/(R1+R2)$  was informative enough to classify all three possible genotypes as follows. If the genotype is AA|AB, then  $R1/(R1+R2)=1-0.5f$ , where  $f$  denotes fetal fraction. As  $f$  is the minor component and  $f<0.5$ , then  $1-0.5f \geq 0.75$ . If the genotype is AB|AA, then  $R1/(R1+R2)=0.5+0.5f$ . As  $f<0.5$ , then must  $0.5+0.5f \leq 0.75$ . If the genotype is AB|AB, then  $R1/(R1+R2)=0.5$  irrespective of  $f$  values. Therefore, for each polymorphic site (Fig. S2,  $RR2=R2/(R1+R2)$  and  $RR3=R3/(R1+R2+R3)$ ), if only one informative allele was detected ( $RR2<\alpha$ ), then the genotype would be AA|AA. If two informative alleles were present ( $RR2 \geq \alpha$  and  $RR3 < \alpha$ ), then the site should be one of the genotypes having two different alleles (AA|AB, AB|AA or AB|AB), which could be identified using the ratio  $R1/(R1 + R2)$  as follows: when the ratio  $\geq 0.75$ , the genotype was estimated to be AA|AB, between  $0.5+\alpha$  and  $0.75$  to be AB|AA and between  $0.5$  and  $0.5+\alpha$  to be AB|AB. If three alleles were informative ( $RR3 \geq \alpha$ ), then the genotype was AB|AC if  $R2/R1 \geq 0.5$ , and  $R3$  was considered as a background noise outlier otherwise. Clearly, relative allelic read counts of three genotypes were affected by the sample's fetal fraction, and the estimated read count derived from fetal genetic materials (FC, FetalReads) was calculated along with the total read count (TC, TotalReads) for each polymorphic site (Fig. S2, Table S1). Finally, the fetal read counts (FetalReads) were regressed against the total read counts (TotalReads) for a panel of polymorphic sites using the R's rlm function in MASS package with the fitting model  $y = \beta x + 0$ , and fetal fraction was estimated as the model coefficient ( $\beta$ ).

For example, the following are imaginary representative allelic read counts for five polymorphic sites from a sample (R1-R3: allelic read counts in descending order). Background  $\alpha$  is set to 0.01.

| MarkerID | R1    | R2   | R3   |
|----------|-------|------|------|
| ID-01    | 14127 | 35   | 0    |
| ID-02    | 4105  | 577  | 13   |
| ID-03    | 3148  | 3101 | 54   |
| ID-04    | 5809  | 3552 | 27   |
| ID-05    | 4007  | 3028 | 1011 |

For ID-01,  $RR2=R2/(R1+R2)=35/(14127+35)=0.002<0.01$ , genotype is AA|AA.  
FetalReads=NA. TotalReads=R1 =14127.

For ID-02,  $RR2=R2/(R1+R2)=577/(4105+577)=0.123 \geq 0.01$  and  
 $RR3=R3/(R1+R2+R3)=13/(4105+577+13)=0.003<0.01$ , two alleles are informative.  
Ratio= $R1/(R1+R2)=0.877$ . As Ratio $\geq 0.75$ , genotype is AA|AB.  
FetalReads= $2 \times R2=2 \times 577=1154$ . TotalReads= $R1+R2=4682$ .

For ID-03,  $RR2=0.496 \geq 0.01$  and  $RR3=0.009<0.01$ , two alleles are informative. Ratio= $0.504$ . As  
 $0.5 \leq \text{Ratio} < 0.51$ , genotype is AB|AB.  
FetalReads=NA. TotalReads= $R1+R2=6249$ .

For ID-04,  $RR2=0.379 \geq 0.01$ , and  $RR3=0.003 < 0.01$ , two alleles are informative.  $Ratio=0.621$ . As  $0.51 \leq Ratio < 0.75$ , genotype is AB|AA.  
 FetalReads=R1-R2 =2257, TotalReads=R1+R2=9361.

For ID-05,  $RR2=0.430 \geq 0.01$ , and  $RR3=0.126 > 0.01$ , three alleles are informative. As  $R2/R1=0.756 \geq 0.5$ , genotype is AB|AC.  
 FetalReads=R1-R2+R3=1990, TotalReads=R1+R2+R3=8046.

Three polymorphic sites are considered informative for fetal fraction estimation in the above sample (ID-02, ID-04 and ID-05). Hence a robust linear regression model is fitted using the three informative sites and the fetal fraction (f) is estimated by the following R commands:

```
FetalReads=c(NA,1154,NA,2257,1990)
TotalReads=c(14127,4682,6249,9361,8046)
rlmfit=rlm(FetalReads~TotalReads+0,maxit=1000)
f=rlmfit$coefficients["TotalReads"]
```

Therefore, the estimated fetal fraction (f) for the sample is 0.244.

### Maternal-Fetal Genotype Estimation for Polymorphic Sites

For each sample, fetal fraction was estimated using a panel of allelic read counts. Then the genotype for each polymorphic site was estimated using the minimal AIC value as detailed below (Fig. S5). First, observed allelic read counts ( $O_i$ ), total read count (TotalReads) and expected allelic read counts ( $E_i$ ) for each possible genotype model were calculated for each polymorphic site ( $O_i$  is set to 0.1 if  $O_i = 0$  and  $E_i$  is set to  $TotalReads \times \alpha$  if the expected  $E_i = 0$ ), and then AIC was calculated for each genotype model using the following formula:

$$AIC = 2 \times \sum \left[ O_i \times \ln \left( \frac{O_i}{E_i} \right) \right] - 2 \times df$$

Where df is the residual degrees of freedom. Finally, the genotype for the polymorphic site was estimated to be the one with the minimal AIC, and AIC difference ( $\Delta AIC$ ) was the absolute difference between the minimal AIC and the second minimal AIC. The adjusted AIC =  $AIC/f/TotalReads$ , and the adjusted  $\Delta AIC = \Delta AIC/f/TotalReads$ . AIC could also be calculated using a modified formula as described below and identical genotype estimations were observed for our simulated samples. If only one allele was observed informative, then for model AA|AA, only  $O_1$  and  $E_1$  was used for AIC calculation; for models AB|AA, AB|AB and AA|AB,  $O_1$ - $O_2$  and  $E_1$ - $E_2$  were used; and for model AB|AC, both  $O_1$ - $O_3$  and  $E_1$ - $E_3$  were used. Similarly, if two or three alleles were observed informative, then two or three  $O_i$  and  $E_i$  were used for AIC calculation depending on the specific fitted genotype model.

For example, the estimated fetal fraction for the imaginary sample is  $f=0.244$  and if the expected model fitting background ( $\alpha$ ) is set to 0.005, then the observed and the expected allelic read counts were calculated as follows:

For ID-01, observed allelic read counts are [14127, 35, 0], then  $O_1=14127$ ,  $O_2=35$  and  $O_3=0.1$ ,  
 TotalReads= $R_1+R_2+R_3=14127+35+0=14162$ ,  $df=3-1=2$ ,  $f=0.244$ .

Fitting AA|AA model:

$$E_1=TotalReads \times (1 - 2 \times \alpha)=14162 \times (1 - 2 \times 0.005)=14020.38$$

$$E_2=TotalReads \times \alpha=70.81$$

$$E_3=TotalReads \times \alpha=70.81$$

$$AIC_{AA|AA}=2 \times \left( O_1 \times \ln \frac{O_1}{E_1} + O_2 \times \ln \frac{O_2}{E_2} + O_3 \times \ln \frac{O_3}{E_3} \right) - 2 \times df=159.41$$

$$Adjusted\ AIC_{AA|AA}=AIC_{AA|AA}/f/TotalReads=0.046$$

Fitting AA|AB model:

$$E_1=TotalReads \times (1 - \alpha) \times (2 - f)/2=12372.06$$

$$E_2=TotalReads \times (1 - \alpha) \times f/2=1719.13$$

$$E_3=TotalReads \times \alpha=70.81$$

$$AIC_{AA|AB}=3469.89$$

$$Adjusted\ AIC_{AA|AB}=1.004$$

Fitting AB|AA model:

$$E_1=TotalReads \times (1 - \alpha) \times (1 + f)/2=8764.78$$

$$E_2=TotalReads \times (1 - \alpha) \times (1 - f)/2=5326.51$$

$$E_3=TotalReads \times \alpha=70.81$$

$$AIC_{AB|AA}=13129.87$$

$$Adjusted\ AIC_{AB|AA}=3.800$$

Fitting AB|AB model:

$$E_1=TotalReads \times (1 - \alpha) \times 1/2=7045.60$$

$$E_2=TotalReads \times (1 - \alpha) \times 1/2=7045.60$$

$$E_3=TotalReads \times \alpha=70.81$$

$$AIC_{AB|AB}=19279.24$$

$$Adjusted\ AIC_{AB|AB}=5.579$$

Fitting AB|AC model:

$$E_1=TotalReads \times 1/2=7081.00$$

$$E_2=TotalReads \times (1 - f)/2=5353.24$$

$$E_3=TotalReads \times f/2=1727.76$$

$$AIC_{AB|AB}=19156.21$$

$$Adjusted\ AIC_{AB|AB}=5.544$$

As  $AIC_{AA|AA} < AIC_{AA|AB} < AIC_{AB|AA} < AIC_{AB|AC} < AIC_{AB|AB}$ , the estimated genotype for ID-01 site is AA|AA.

$$Minimal\ AIC=AIC_{AA|AA}=159.41$$

$$Minimal\ adjusted\ AIC=Adjusted\ AIC_{AA|AA}=0.046$$

$$\Delta AIC=AIC_{AA|AB} - AIC_{AA|AA}=3469.89-159.41=3310.48$$

$$Adjusted\ \Delta AIC= \Delta AIC/f/TotalReads$$

$$=Adjusted\ AIC_{AA|AB} - Adjusted\ AIC_{AA|AA}=1.004-0.046=0.958$$

The AICs for all other sites are calculated similarly and listed below.

| Marker ID | Total Reads | AIC      |         |          |          |          | Estimated Genotype | Minimal AIC | Minimal Adjusted AIC |
|-----------|-------------|----------|---------|----------|----------|----------|--------------------|-------------|----------------------|
|           |             | AA AA    | AA AB   | AB AA    | AB AB    | AB AC    |                    |             |                      |
| ID-01     | 14162       | 159.41   | 3469.89 | 13129.87 | 19279.24 | 19156.21 | AA AA              | 159.41      | 0.046                |
| ID-02     | 4695        | 2655.61  | 1.67    | 1526.69  | 2996.40  | 3189.20  | AA AB              | 1.67        | 0.001                |
| ID-03     | 6303        | 24207.47 | 5213.19 | 369.79   | 9.62     | 1336.75  | AB AB              | 9.62        | 0.006                |
| ID-04     | 9388        | 25240.70 | 4035.06 | 6.14     | 555.64   | 2276.37  | AB AA              | 6.14        | 0.003                |
| ID-05     | 8046        | 27177.07 | 8863.34 | 4777.25  | 4833.02  | -3.01    | AB AC              | -3.01       | -0.001               |

### Maternal-Fetal Genotype Estimation for Short Genetic Variations

For each site, the maternal-fetal genotype group (AA|AA, AA|AB, AB|AA, AB|AB or AB|AC) was estimated first using its allelic read counts. Then, the wildtype sequence was compared with its different alleles (Table S2-3) and the maternal-fetal mutational status was determined accordingly. For example, if the target site had the genotype AA|AA, and the R1 allele's sequence was wildtype, then the maternal-fetal genotype was WW|WW, while if the R1's sequence was mutant, then it was MM|MM, where W for wildtype and M for mutant. The wildtype/mutant status for other genotypes could be processed similarly.

### Maternal-Fetal Chromosomal/Subchromosomal Abnormality Detection

If a polymorphic site is from a diploid mother carrying a diploid fetus (herein labeled as disomy-disomy for each chromosome), it can only be one of the following five maternal-fetal genotypes, namely AA|AA, AA|AB, AB|AA, AB|AB and AB|AC. However, if the polymorphic site is on the target chromosome of a diploid mother carrying a trisomy fetus (labeled as disomy-trisomy for the target chromosome), it can only be one of the following ten genotypes (AA|AAA, AA|AAB, AA|ABB, AA|ABC, AB|AAA, AB|AAB, AB|AAC, AB|ABC, AB|ACC and AB|ACD). In each cfDNA sample containing a possible trisomy fetal chromosome, all polymorphic sites on the target chromosome are either all disomy-disomy or all disomy-trisomy, but not both. Therefore, for each target polymorphic site, the minimal adjusted AIC for each chromosomal model was calculated first, and then the model that shows best overall fit for all polymorphic sites is selected (Fig. S5). To detect fetal chromosomal monosomy, each polymorphic site is tested against all possible genotypes for a chromosome that is possible monosomy in fetus, and the model that shows best overall fit for all polymorphic sites is selected (Fig. S5). Subchromosomal deletions/duplications could be detected similarly (Fig. S5) using all possible chromosomal models for the target chromosome.

For example, the following are imaginary representative allelic read counts on a target chromosome for two samples, and each has five polymorphic sites on the target chromosome (R1-R4: allelic read counts in descending order). Suppose that the target chromosome is chromosome 21, and we want to test if any of the two samples are trisomy 21. Background  $\alpha$  is set to 0.01.

| SampleId | SiteId | Allelic Counts (Descending) |      |      |    |
|----------|--------|-----------------------------|------|------|----|
|          |        | R1                          | R2   | R3   | R4 |
| S001     | Id001  | 9565                        | 14   | 4    | 0  |
|          | Id002  | 5820                        | 652  | 6    | 3  |
|          | Id003  | 6718                        | 4465 | 12   | 5  |
|          | Id004  | 7838                        | 7656 | 34   | 12 |
|          | Id005  | 9465                        | 7552 | 1898 | 33 |
| S002     | Id001  | 7021                        | 1574 | 7    | 3  |
|          | Id002  | 10588                       | 1185 | 1164 | 23 |
|          | Id003  | 3408                        | 2861 | 23   | 12 |
|          | Id004  | 9059                        | 6012 | 1505 | 34 |
|          | Id005  | 9386                        | 9373 | 1899 | 18 |

Then each polymorphic site is tested against all genotypes of both the disomy-disomy model and the disomy-trisomy model, and the best fit genotypes for the disomy-disomy model and the disomy-trisomy model are listed below.

#### Overall Goodness-of-fit Test Results for Different Chromosomal Models

| SampleId | SiteId | Best Fit Genotype for Each Model |       |         |         |                      |       |         |         |
|----------|--------|----------------------------------|-------|---------|---------|----------------------|-------|---------|---------|
|          |        | Disomy-Disomy Model              |       |         |         | Disomy-Trisomy Model |       |         |         |
|          |        | Genotype                         | TC    | G       | AIC     | Genotype             | TC    | G       | AIC     |
| S001     | Id001  | AA AA                            | 9565  | 0       | 0       | AA AAA               | 9565  | 0       | 0       |
|          | Id002  | AA AB                            | 6472  | 0.039   | -1.961  | AA AAB               | 6472  | 7.338   | 5.338   |
|          | Id003  | AB AA                            | 11183 | 0.025   | -1.975  | AB AAA               | 11183 | 60.564  | 58.564  |
|          | Id004  | AB AB                            | 15494 | 2.138   | 0.138   | AB AAB               | 15494 | 97.537  | 95.537  |
|          | Id005  | AB AC                            | 18915 | 0.054   | -3.946  | AB AAC               | 18915 | 154.291 | 150.291 |
| S002     | Id001  | AA AB                            | 8595  | 543.745 | 541.745 | AA ABB               | 8595  | 0.099   | -1.901  |
|          | Id002  | AA AB                            | 12937 | 3131.2  | 3129.2  | AA ABC               | 12937 | 0.193   | -3.807  |
|          | Id003  | AB AB                            | 6269  | 47.789  | 45.789  | AB AAB               | 6269  | 0.084   | -1.916  |
|          | Id004  | AB AC                            | 16576 | 143.656 | 139.656 | AB AAC               | 16576 | 0.077   | -3.923  |
|          | Id005  | AB AC                            | 20658 | 245.48  | 241.48  | AB ABC               | 20658 | 0.266   | -3.734  |

For the sample S001, nearly all polymorphic sites fit the disomy-disomy model better than the disomy-trisomy model, hence chromosome 21 in the sample S001 is normal for both the mother and the fetus.

For the sample S002, all polymorphic sites fit the disomy-trisomy model better than the disomy-disomy model, hence chromosome 21 in the sample S002 is normal for the mother and trisomy for the fetus.

#### Plotting Distributions of Relative Allelic Read Counts

For the disomy-disomy model, five maternal-fetal genotypes are possible and there are at most three alleles for each polymorphic site. Hence, knowing the relative allelic counts for any two alleles is informative enough to calculate the relative counts for the third one. Therefore, for each polymorphic site, allelic read counts were calculated and labeled as R1, R2 and R3, whereas  $R1 \geq R2 \geq R3$ , and then the relative allelic counts  $RRC1 = R1/(R1+R2+R3)$  and  $RRC2 =$

$R2/(R1+R2+R3)$  were calculated, followed by the plotting of RRC2 against RRC1. For the disomy-monosomy model or the subchromosomal deletion model, RRC1 was plotted against RRC2 similarly for each polymorphic site, and distinct clusters corresponding to different chromosomal genotypes were shown in the generated plot. As there were at most four alleles for each polymorphic site for the disomy-trisomy model or the subchromosomal duplication model, RRC1 was calculated as  $R1/(R1+R2+R3+R4)$ , RRC2 as  $R2/(R1+R2+R3+R4)$ , RRC3 as  $R3/(R1+R2+R3+R4)$  and RRC4 as  $R4/(R1+R2+R3+R4)$ . Then, RRC2 and RRC4 were plotted against RRC1 for the disomy-trisomy model, while RRC2 and RRC3 were plotted against RRC1 for the subchromosomal duplication model to distinguish all possible genotypes graphically.

### Plotting Short Genetic Variations

For each polymorphic site, the wildtype allele ( $R_w$ ) was counted first followed by the count of mutant alleles as  $R_{m1}$ ,  $R_{m2}$ ,  $R_{m3}$ , whereas  $R_{m1} \geq R_{m2} \geq R_{m3}$ . Then the relative mutant allele 1's count ( $R_{m1}/\text{TotalCount}$ ) was plotted against the relative wildtype allele count ( $R_w/\text{TotalCount}$ ) and all the possible maternal-fetal wildtype-mutant genotypes could be identified on the generated graph easily.

### Fetal Fraction Estimation for cfDNA samples from surrogate mothers

For cfDNA samples from surrogate mothers, at most 4 alleles are possible for each polymorphic site on a normal chromosome. To estimate fetal fraction using a panel of polymorphic sites (Fig. S21), an initial fetal fraction estimate ( $f_0$ ) is set, followed by iteratively updating  $f_0$  until converge. To update  $f_0$ , allelic goodness-of-fit test is performed for each polymorphic site to select the best fit genotype under the current  $f_0$  estimate, followed by the estimation of read count derived from fetal genetic materials (FC, FetalReads) and the total read count (TC, TotalReads), and then new fetal fraction ( $f$ ) is estimated by fitting a rlm model using the FCs and TCs of all polymorphic sites. Finally  $f_0$  is set to  $f$ ,  $f_0$  is updated iteratively until the change of  $f_0$  for each iteration is very small ( $|f-f_0| < \epsilon$ ).

For example, the following are imaginary representative allelic read counts for nine polymorphic sites from a sample (R1-R5: allelic read counts in descending order). Background  $\alpha$  is set to 0.01,  $\epsilon=0.001$ .

| SiteId | Allelic Counts |       |      |      |    |
|--------|----------------|-------|------|------|----|
|        | 1              | 2     | 3    | 4    | 5  |
| Id001  | 35             | 14127 |      |      |    |
| Id002  | 4105           | 577   | 13   | 7    | 9  |
| Id003  | 54             | 3101  | 3148 | 23   |    |
| Id004  | 11             | 5809  | 27   | 3552 | 17 |
| Id005  | 3028           | 1011  | 4007 | 6    | 6  |
| Id006  | 36             | 936   | 3322 | 28   | 16 |
| Id007  | 5422           | 52    | 974  | 938  | 27 |
| Id008  | 1498           | 4835  | 1537 | 4711 | 38 |
| Id009  | 36             | 3412  | 2237 | 3493 | 23 |



Step 1, set  $f_0=0.10$  (initial estimate).

Step 2, for each polymorphic site, estimate FC and TC using allelic goodness-of-fit test. For example, for site Id006, R1 to R4 are set to 3322, 936, 36 and 28. As  $R2/(R1+R2) \geq \alpha$  and  $R3/(R1+R2+R3) < \alpha$ , there are two informative alleles. The allelic counts R1 to R4 are tested against 9 genotype models (AA|AA, AA|AB, AB|AA, AB|AB, AB|AC, AA|BB, AA|BC, AB|CC, AB|CD) assuming fetal fraction is  $f_0$ . As the best fit genotype for Id006 is AA|BB, FC=936 and TC=4258. FCs and TCs for all other polymorphic sites are estimated similarly.

Step 3, calculate fetal fraction  $f$  by fitting a robust linear regression model for all FC and TC pairs.

Step 4, if  $|f-f_0| > \epsilon$ , then set  $f_0=f$  and execute Step 2; else the fetal fraction is estimated as  $f$ .

The iterative results for the above example are listed below.

| Iterative Step | $f_0$  | $f$    | $ f-f_0 $ |
|----------------|--------|--------|-----------|
| 1              | 0.1    | 0.2385 | 0.1385    |
| 2              | 0.2385 | 0.2436 | 0.0051    |
| 3              | 0.2436 | 0.2436 | 0         |

Therefore, the estimated fetal fraction ( $f$ ) for the sample is 0.2436.
